# Supplementary material for: Understanding the role of alcohols in the growth behaviour of ZnO nanostructures prepared by solution based synthesis and their application in solar cells
Source: Royal Society of Chemistry journal article supplement (doi:10.1039/c9nj03212f), 2019-01-01
Supplement: c9nj03212f1.pdf [file c9nj03212f1.pdf]

## Supplementary Data

### Understanding the role of alcohols in the growth behaviour of ZnO nanostructures prepared by solution based synthesis and its applications in solar Cells

Ramya M<sup>a</sup>, Nideep T.K<sup>a</sup>, V. P. N. Nampoori<sup>a</sup>, M. Kailasnath<sup>\*a</sup>

<sup>a</sup>International School of Photonics, Cochin University of Science and Technology,  
Kochi, India.

e mail: [kailas@cusat.ac.in](mailto:kailas@cusat.ac.in)

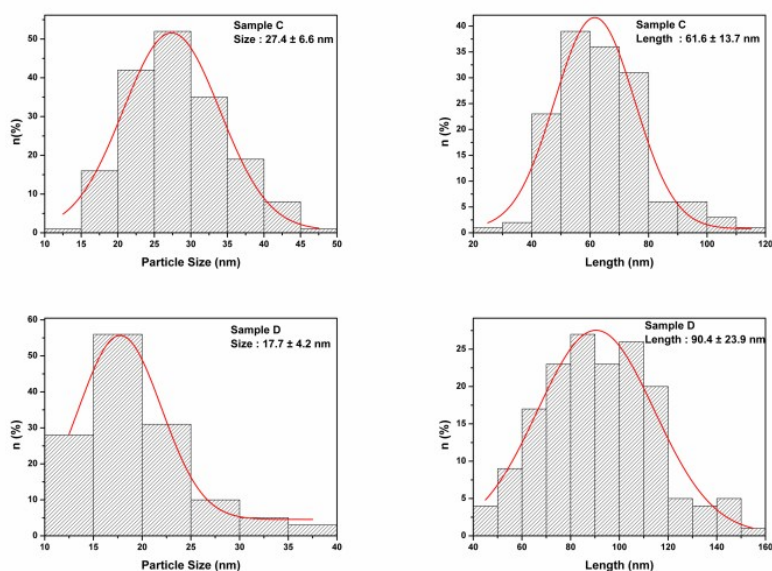

Figure S<sub>1</sub>: FESEM size and length distribution of ZnO nanorods prepared in butanol and hexanol.

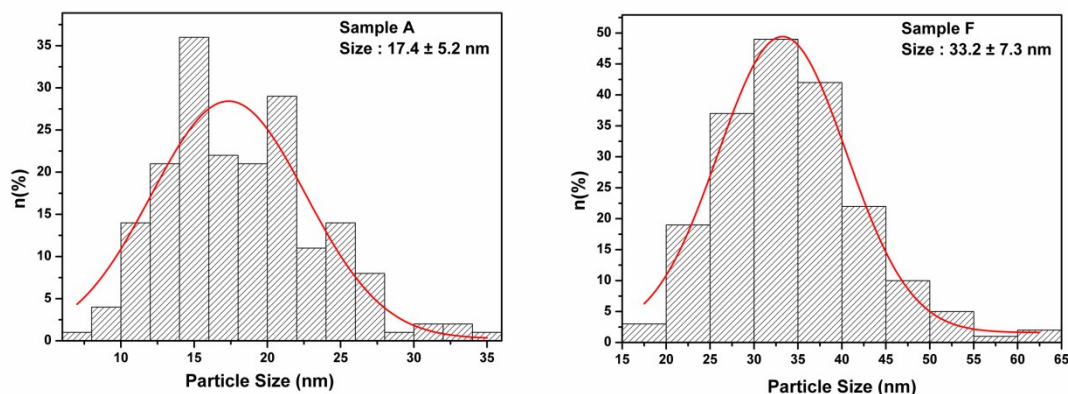

Figure S<sub>2</sub>: FESEM size distribution of ZnO nanodots prepared in methanol and decanol

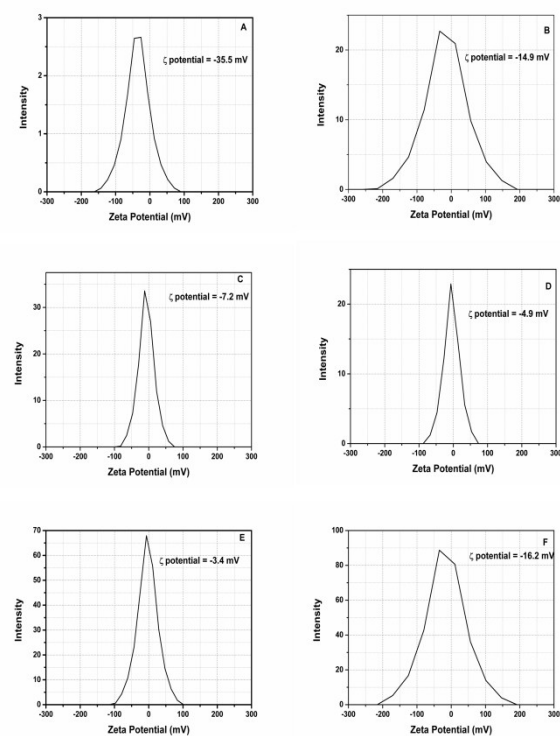

**Figure S<sub>3</sub>: Zeta potential values of ZnO nanostructures (A) methanol (B) ethanol (C) butanol (D) hexanol (E) octanol (F) decanol**

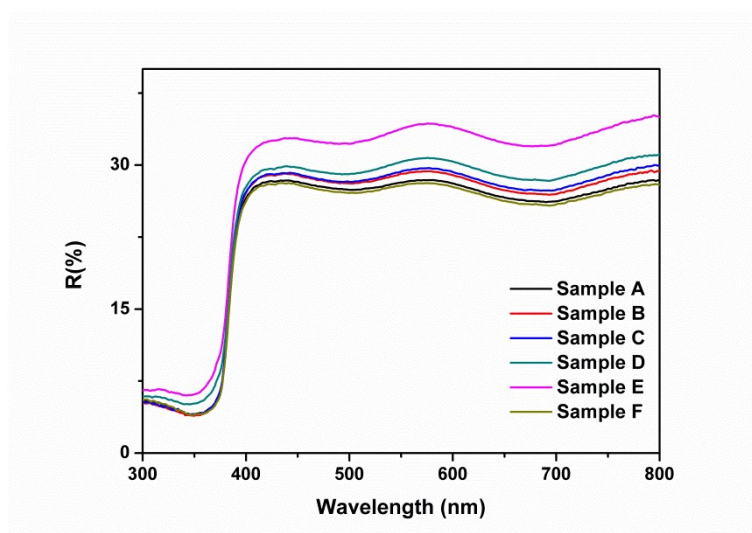

**Figure S<sub>4</sub>: Reflectance spectra of ZnO nanostructures**

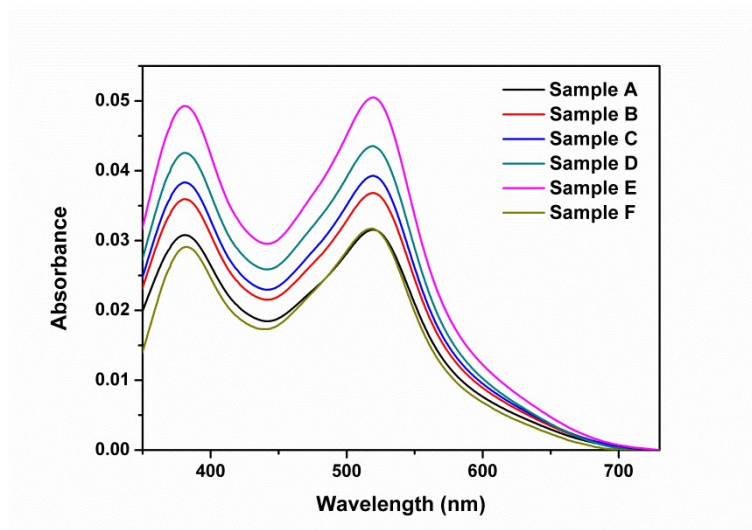

Figure S<sub>5</sub>: UV-vis absorbance spectra of solution containing dye desorbed from the sensitized photoanodes.

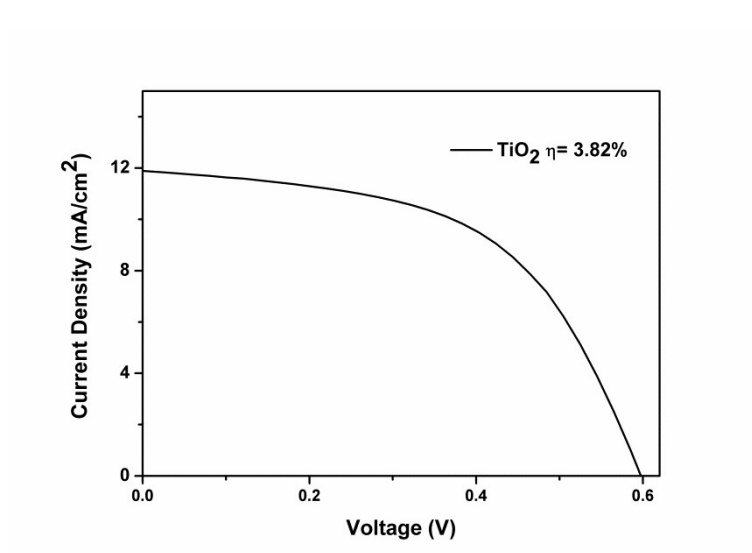

Figure S<sub>6</sub>: J-V curve of DSSC based on TiO<sub>2</sub> nanoparticles.
